# Supplementary material for: Expression of the Microtubule-Associated Protein MAP9/ASAP and Its Partners AURKA and PLK1 in Colorectal and Breast Cancers
Source: Hindawi journal article supplement (doi:10.1155/2014/798170), 2014-01-01
Supplement: f1 [file 798170.f1.pdf]

| Sample nb | Sample Name | Gender | Age | Tumor Localisation | Tumor stage | Nodal status |
|-----------|-------------|--------|-----|--------------------|-------------|--------------|
| 1         | P02.7757    | M      | 62  | RightColon         | 3           | -            |
| 2         | P02.15882   | M      | 89  | RightColon         | 3           | -            |
| 3         | P99.10207   | F      | 76  | Rectum             | 2           | +            |
| 4         | P99.13058   | M      | 67  | Rectum             | 3           | +            |
| 5         | P99.4796    | F      | 60  | LeftColon          | 3           | +            |
| 6         | P99.15422   | M      | 75  | RightColon         | 3           | +            |
| 7         | P99.6928    | F      | 66  | Rectum             | 2           | -            |
| 8         | P99.15220   | M      | 81  | LeftColon          | 1           | -            |
| 9         | P99.7772    | F      | 78  | LeftColon          | 3           | -            |
| 10        | P99.11260   | M      | 82  | LeftColon          | 2           | -            |
| 11        | P99.11612   | M      | 76  | Rectum             | 4           | -            |
| 12        | P99.15390   | M      | 80  | Rectum             | 4           | +            |
| 13        | P99.15773   | M      | 71  | LeftColon          | 2           | +            |
| 14        | P99.8484    | M      | 77  | RightColon         | 3           | +            |
| 15        | P00.788     | M      | 70  | RightColon         | 4           | +            |
| 16        | P00.884     | M      | 67  | RightColon         | 4           | +            |
| 17        | P00.976     | F      | 61  | Rectum             | 3           | +            |
| 18        | P00.2326    | F      | 64  | Rectum             | 3           | +            |
| 19        | P00.5564    | M      | 64  | Rectum             | 4           | -            |
| 20        | P00.2404    | M      | 63  | LeftColon          | 4           | -            |
| 21        | P00.6457    | F      | 75  | Rectum             | 3           | +            |
| 22        | P00.347     | F      | 75  | LeftColon          | 4           | +            |
| 23        | P00.2646    | M      | 60  | RightColon         | 2           | -            |
| 24        | P00.4234    | F      | 77  | Rectum             | 2           | -            |
| 25        | P00.4985    | M      | 72  | LeftColon          | 3           | -            |

|    |          |   |    |        |   |   |
|----|----------|---|----|--------|---|---|
| 26 | P00.6365 | M | 76 | Rectum | 3 | + |
|----|----------|---|----|--------|---|---|

Additional Table 1

CRC patients and sample characteristics
